# Supplementary material
Source: PubMed Central journal article supplement (PMC3521532)
Supplement: NIHMS426266-supplement-1.pdf [file NIHMS426266-supplement-1.pdf]

## **SUPPLEMENTAL FILES FOR:**

### **MASS SPECTROMETRY-BASED QUANTIFICATION OF PSEUDOURIDINE IN RNA**

Balasubrahmanyam Addepalli and Patrick A. Limbach\*

Rieveschl Laboratories for Mass Spectrometry, Department of Chemistry, PO Box 210172,  
University of Cincinnati, Cincinnati, OH 45221-0172

\*To whom correspondence should be addressed.

Phone (513) 556-1871

Fax (513) 556-9239

email [Pat.Limbach@uc.edu](mailto:Pat.Limbach@uc.edu)

#### **ABSTRACT**

Direct detection of pseudouridine ( $\psi$ ), an isomer of uridine, in RNA is challenging. The most popular method requires chemical derivatization using N-cyclohexyl-N'- $\beta$ -(4-methylmorpholinum ethyl) carbodiimide *p*-tosylate (CMCT) followed by radiolabeled primer extension mediated by reverse transcriptase. More recently, mass spectrometry (MS)-based approaches for sequence placement of pseudouridine in RNA have been developed. All of these approaches, however, only yield qualitative information regarding the presence or absence of pseudouridine in a given RNA population. Here, we have extended a previously developed liquid chromatography tandem mass spectrometry (LC-MS/MS) method to enable both the qualitative and quantitative analysis of pseudouridine. Quantitative selected reaction monitoring (SRM) assays were developed using synthetic oligonucleotides, with or without pseudouridine, and the results yielded a linear relationship between the ion abundance of the pseudouridine-specific fragment ion and the amount of pseudouridine-containing oligonucleotide present in the original sample. Using this quantitative SRM assay, the extent of pseudouridine hypomodification in the conserved T-loop of tRNA isolated from two different *Escherichia coli* strains was established.

#### **SUPPLEMENTAL INFORMATION**

**Supplemental Figures S1 – S6**

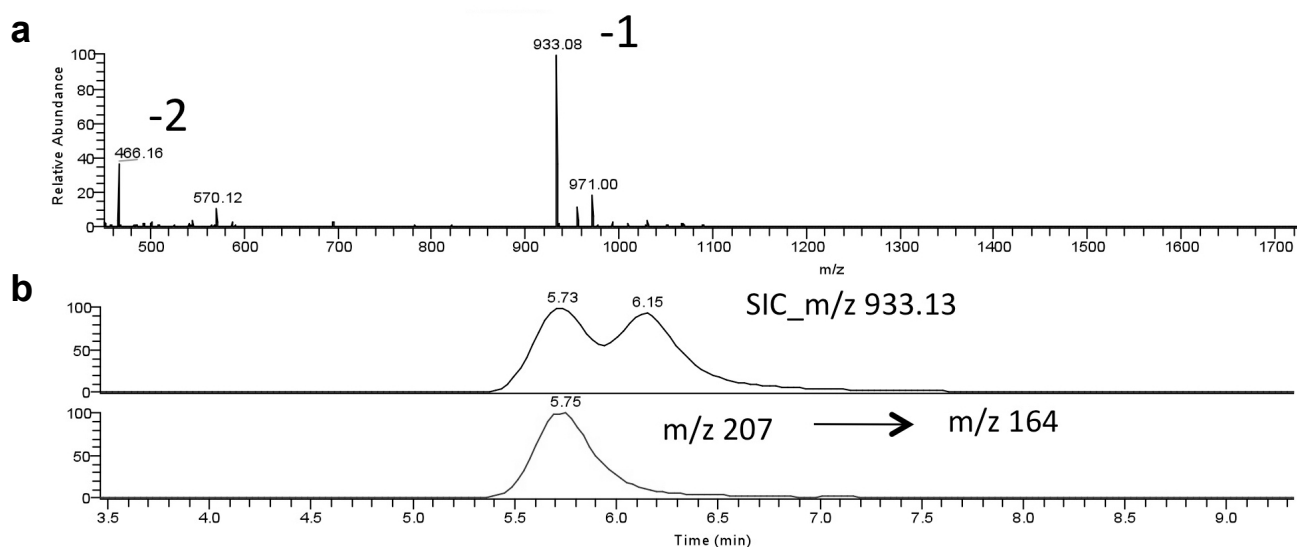

**Supplemental Figure S1.** Representative mass spectrum and selected ion chromatogram of G $\psi$ G and GUG. (a) Mass spectrum of the oligonucleotide mixture (charge states are labeled), (b) selected ion chromatogram at 35 pmol concentration of each oligomer (top) and  $\psi$ -specific SRM transition (bottom).

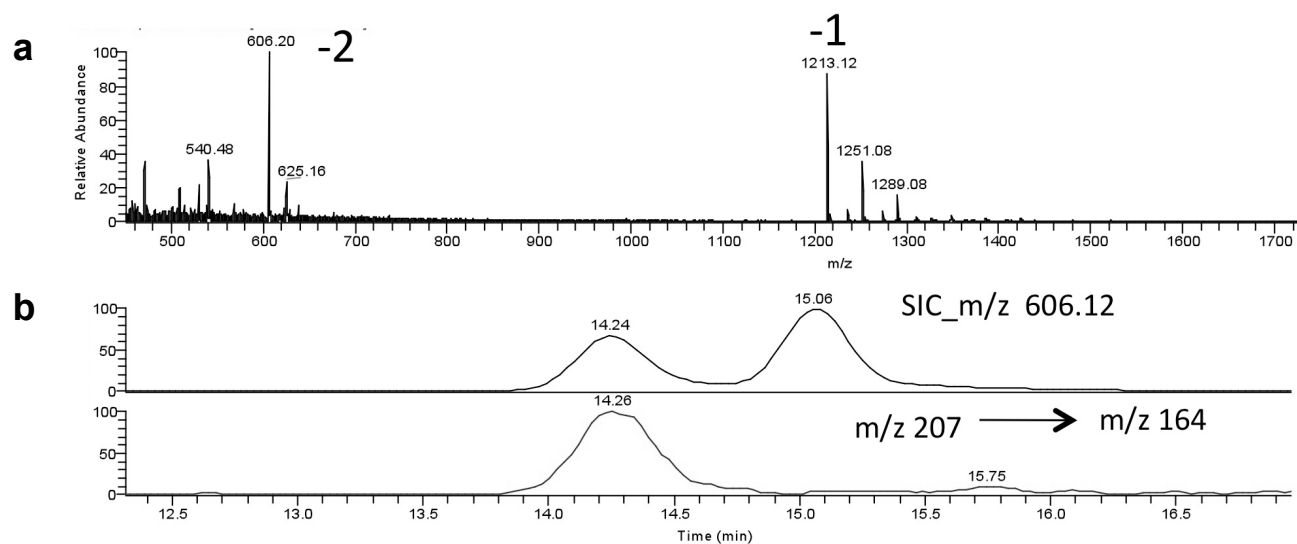

**Supplemental Figure S2.** Representative mass spectrum and selected ion chromatogram of T $\psi$ CG and TUCG. (a) Mass spectrum of the oligonucleotide mixture (charge states are labeled), (b) selected ion chromatogram at 35 pmol concentration of each oligomer (top) and  $\psi$ -specific SRM transition (bottom).

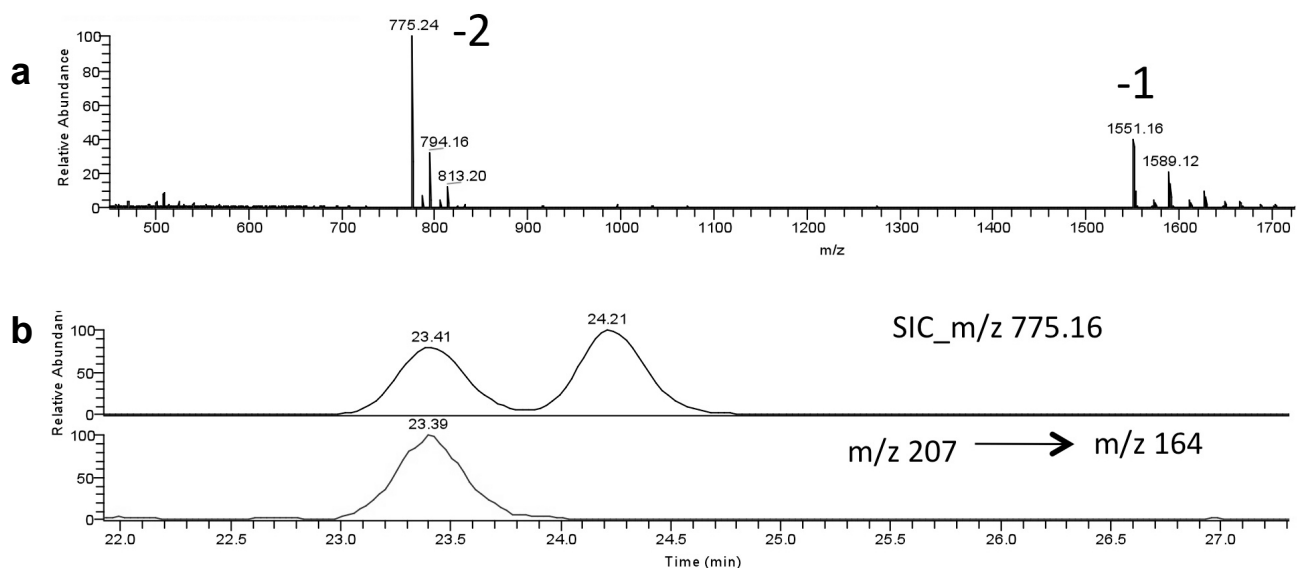

**Supplemental Figure S3.** Representative mass spectrum and selected ion chromatogram of A $\psi$ CAG and AUCAG. (a) Mass spectrum of the oligonucleotide mixture (charge states are labeled), (b) selected ion chromatogram at 35 pmol concentration of each oligomer (top) and  $\psi$ -specific SRM transition (bottom).

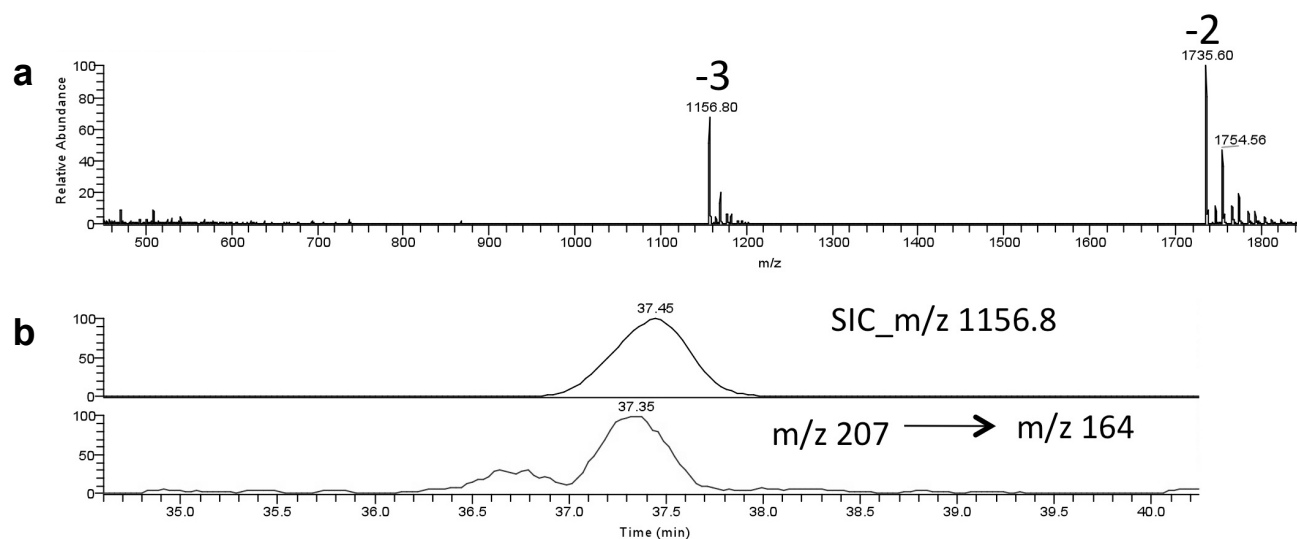

**Supplemental Figure S4.** Representative mass spectrum and selected ion chromatogram of UAAC $\psi$ AUGACG and UAACUAUGACG. (a) Mass spectrum of the oligonucleotide mixture (charge states are labeled), (b) selected ion chromatogram at 35 pmol concentration of each oligomer (top) and  $\psi$ -specific SRM transition (bottom).

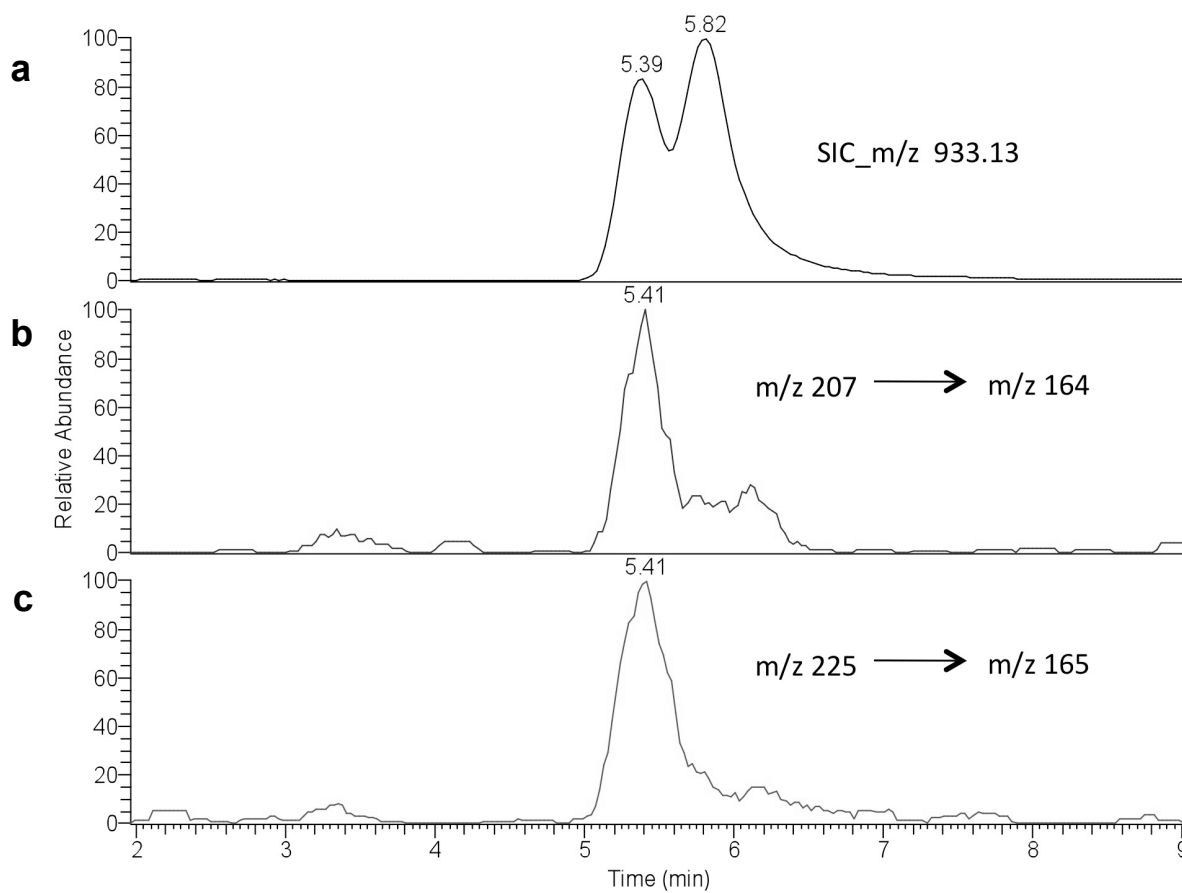

**Supplemental Figure S5.** Representative selected ion chromatogram of  $\psi$ GG and UGG. (a) selected ion chromatogram at 35 pmol concentration of each oligomer, (b)  $\psi$ -specific SRM transition, (c) 5' terminal  $\psi$ -specific SRM transition.

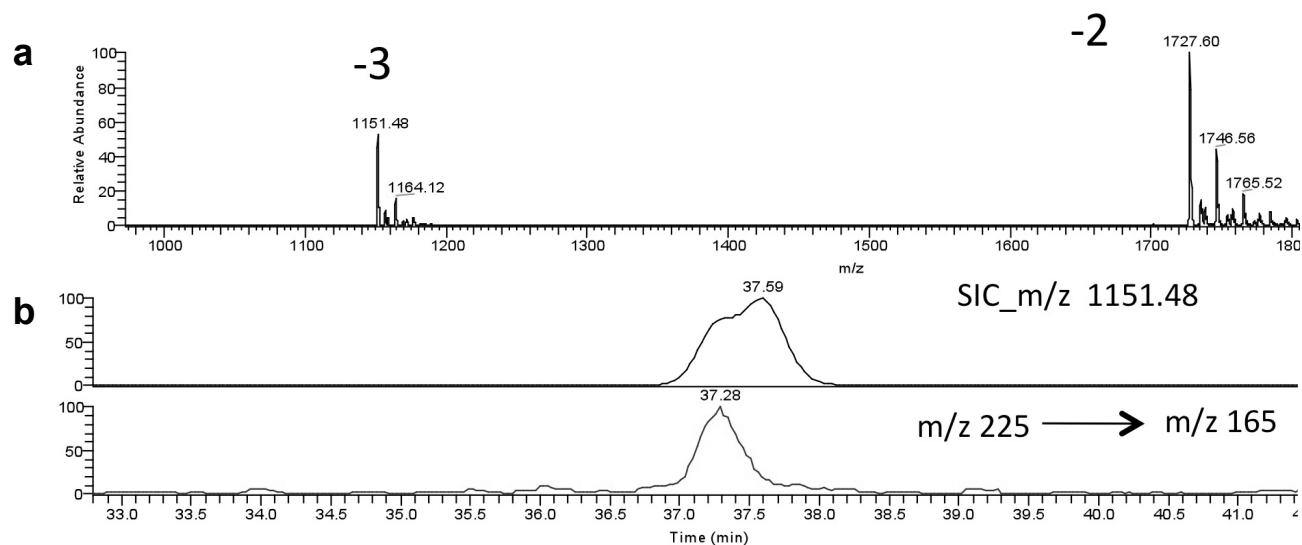

**Supplemental Figure S6.** Representative mass spectrum and selected ion chromatogram of  $\psi$ AACUAUAACG and UAACUAUAACG. (a) Mass spectrum of the oligonucleotide mixture (charge states are labeled), (b) selected ion chromatogram at 35 pmol concentration of each oligomer (top) and  $\psi$ -specific SRM transition (bottom).
